# Supplementary material for: Long-term ambient hydrocarbon exposure and incidence of urinary bladder cancer
Source: Sci Rep. 2022 Dec 2;12:20799. doi: 10.1038/s41598-022-25425-6 (PMC9718740; doi:10.1038/s41598-022-25425-6)
Supplement: Supplementary file 1 — Supplementary Information. [file 41598_2022_25425_MOESM1_ESM.docx]

Supplementary Information

**Long-term ambient hydrocarbon exposure and incidence of urinary bladder cancer**

Han-Wei Zhang, PhD, Zhi-Ren Tsai, PhD, Victor C. Kok, MD, PhD, FACP, Hsiao-Ching Peng, MSc, Yau-Hung Chen, PhD, Jeffrey J.P. Tsai, PhD, and Chung Y. Hsu, PhD

Corresponding Author: Victor C. Kok, victorkok@asia.edu.tw

Supplementary Figures: 3.

Supplementary Tables: 4.

**Legends of Figures and Tables**

**Supplementary Figure S1.** Population distribution of the daily average concentrations of air pollutants (SO2, CO2, CO, O3, PM10, and PM2.5) over a 10-year exposure period.

**Supplementary Figure S2.** Population distribution of the daily average concentrations of air pollutants (NOX, NO, NO2, THC, NMHC, and CH4) over a 10-year exposure period.

**Supplementary Figure S3.** Both ambient pollutants show a long-term monotonic downward trend over time according to the Mann-Kendall test. Sen’s method used to estimate the slope of the trend over the study period revealed a downward trend of -0.03 units per year for THC (95% CI, -0.04 to -0.02; *** p < 0.001) and -0.01 units/year for NMHC (95% CI, -0.01 to -0.01; *** p < 0.001).

**Supplementary Table S1.** Pearson’s correlation analysis of air pollutants in the present study population at risk over a 10-year exposure period.

**Supplementary Table S2**. Mean and distribution of air pollutants linked to the present study population according to the postal code over a 10-year exposure period.

**Supplementary Table S3**. Sensitivity analysis showing adjusted hazard ratios of developing urinary bladder cancer stratified by sex during long-term THC or NMHC exposure at a standard deviation (SD) increment controlled for PM2.5 and other air pollutants

**Supplementary Table S4.** Sensitivity analysis showing adjusted hazard ratios of the incidence of urinary bladder cancer stratified by diabetes mellitus status during long-term THC or NMHC exposure at a standard deviation (SD) increment controlled for PM2.5 and other air pollutants.

**Supplementary Figure S1.** Population distribution of the daily average concentrations of air pollutants (SO2, CO2, CO, O3, PM10, and PM2.5) over a 10-year exposure period.


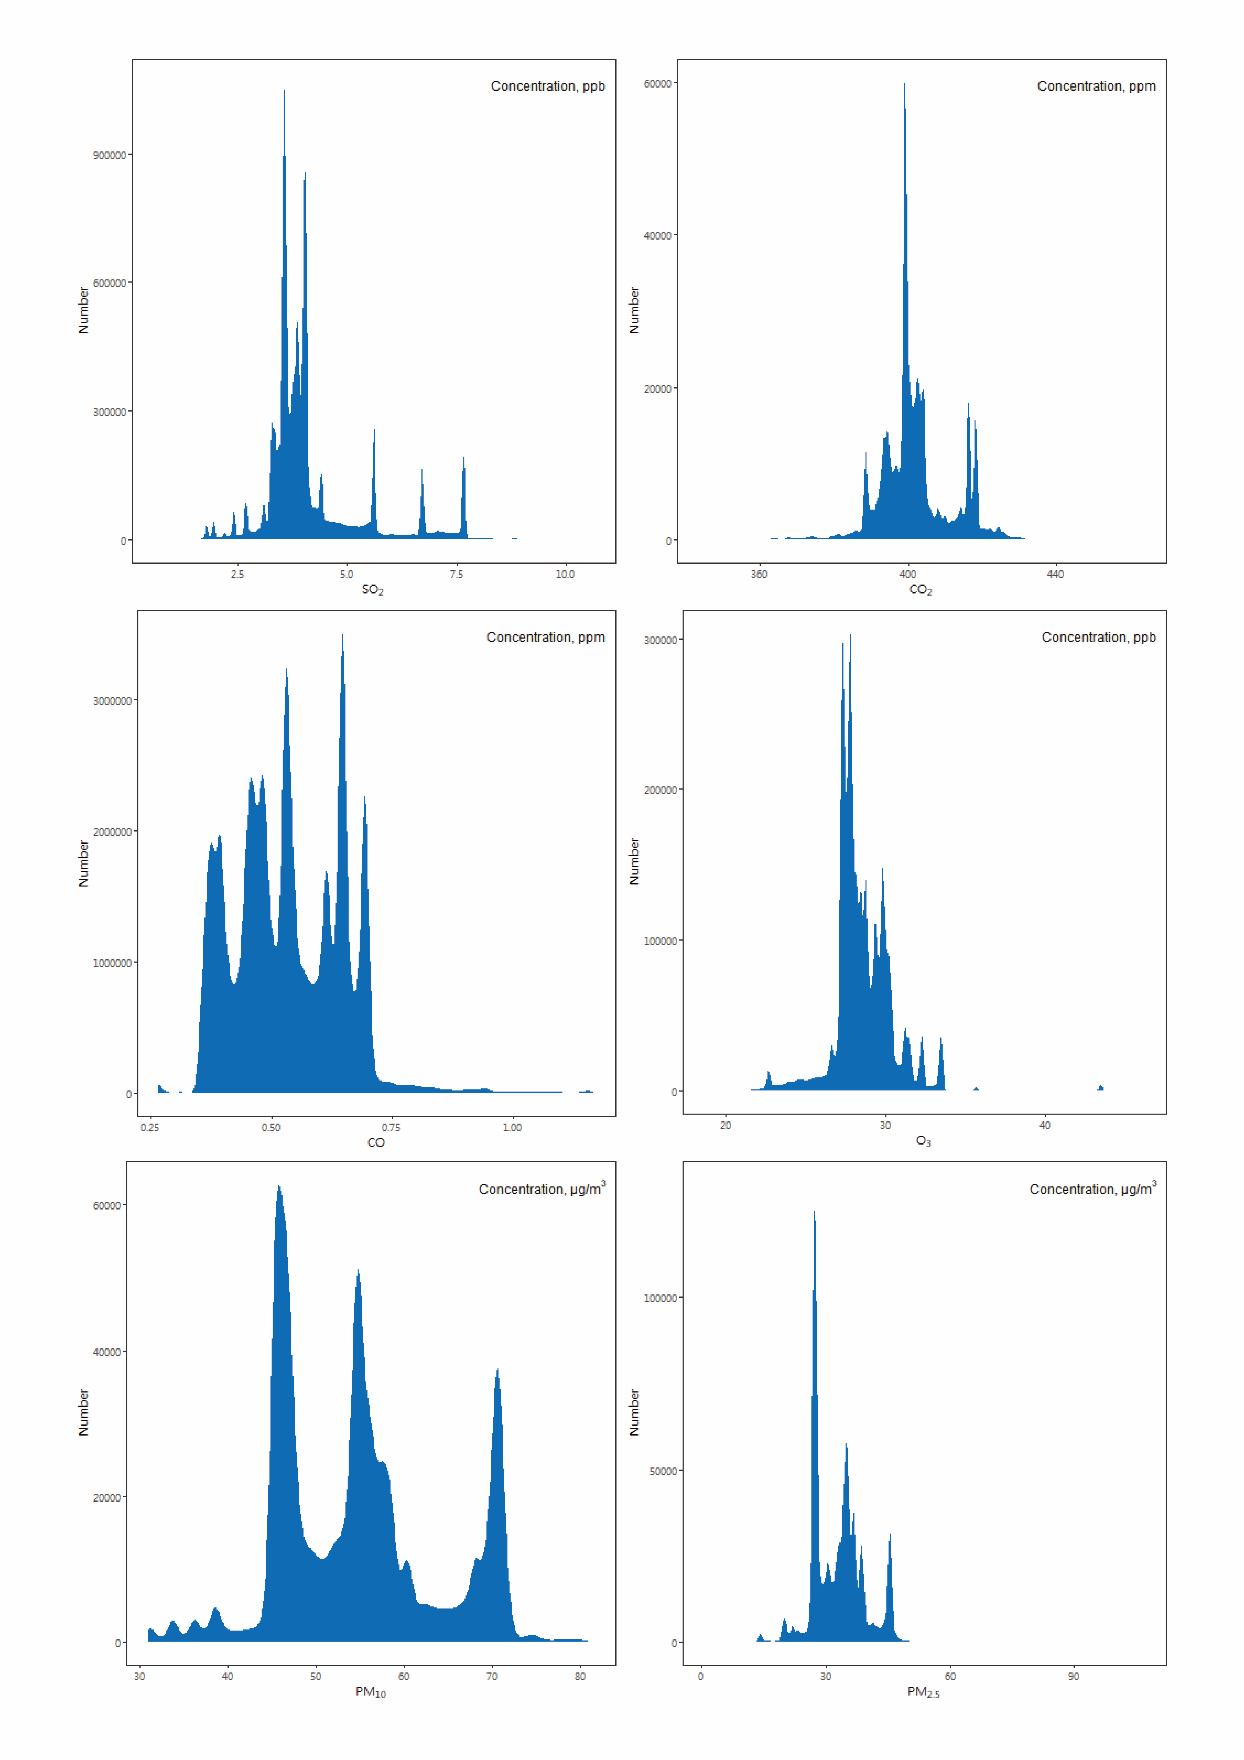


**Supplementary Figure S2.** Population distribution of the daily average concentrations of air pollutants (NOX, NO, NO2, THC, NMHC, and CH4) over a 10-year exposure period.

**
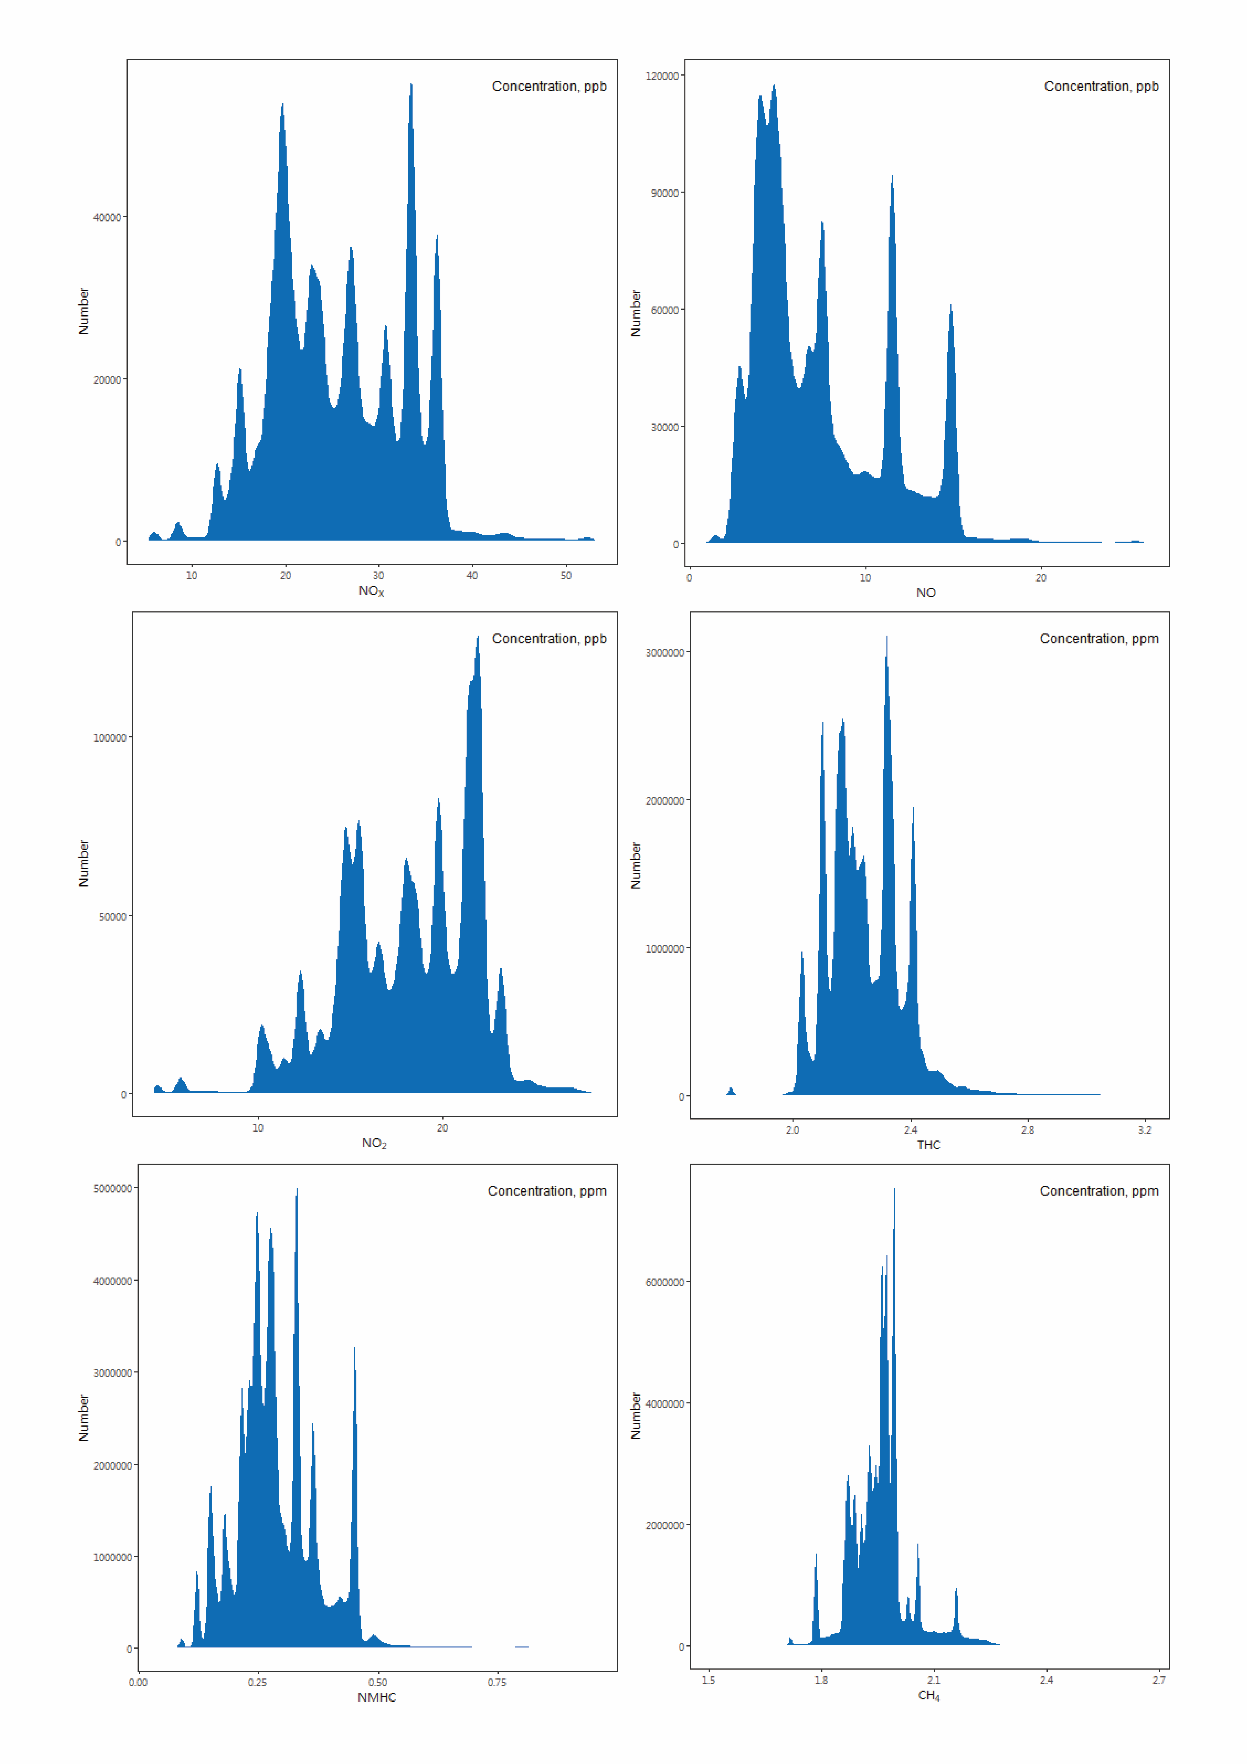
**

**Supplementary Figure S3.** Both ambient pollutants show a long-term monotonic downward trend over time according to the Mann-Kendall test.

**
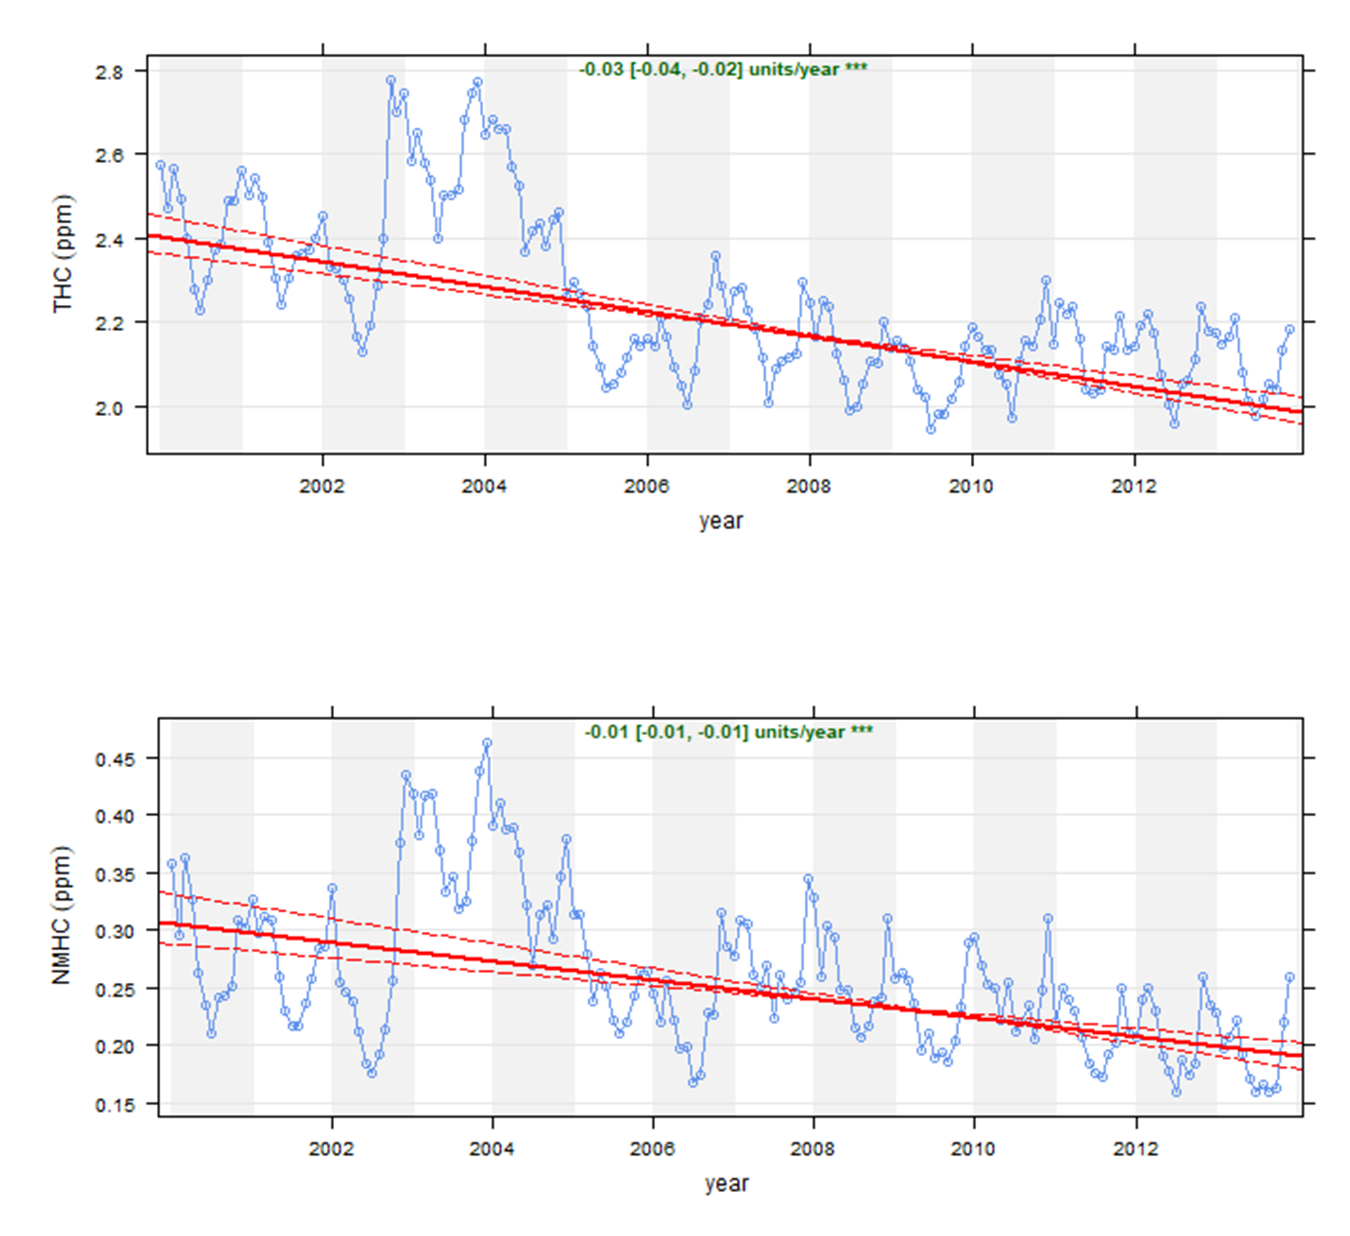
**

Sen’s method used to estimate the slope of the trend over the study period revealed a downward trend of -0.03 units per year for THC (95% CI, -0.04 to -0.02; *** p < 0.001) and -0.01 units/year for NMHC (95% CI, -0.01 to -0.01; *** p < 0.001).

**Supplementary Table S1.** Pearson’s correlation analysis of air pollutants in the present study population at risk over a 10-year exposure period

|  | SO2 | CO2 | CO | O3 | PM10 | PM2.5 | NOX | NO | NO2 | THC | NMHC | CH4 |
| --- | --- | --- | --- | --- | --- | --- | --- | --- | --- | --- | --- | --- |
| SO2 | 1 | **-0.025†** | **0.196†** | **0.011†** | 0.612**†** | 0.602**†** | **0.266†** | **0.074†** | 0.441**†** | **0.089†** | **0.159†** | **-0.033†** |
| CO2 |  | 1 | **-0.286†** | **0.042†** | 0.380**†** | **0.262†** | **-0.224†** | **-0.299†** | **-0.130†** | -0.489**†** | -0.413**†** | -0.370**†** |
| CO |  |  | 1 | -0.638**†** | -0.306**†** | **-0.223†** | 0.960**†** | 0.930**†** | 0.890**†** | 0.687**†** | 0.865**†** | **0.183†** |
| O3 |  |  |  | 1 | 0.341**†** | **0.298†** | -0.587**†** | -0.524**†** | -0.592**†** | -0.436**†** | -0.483**†** | **-0.186†** |
| PM10 |  |  |  |  | 1 | 0.930**†** | **-0.268†** | -0.442**†** | **-0.056†** | **-0.238†** | -0.370**†** | **0.011†** |
| PM2.5 |  |  |  |  |  | 1 | **-0.214†** | -0.405**†** | **0.011†** | **-0.287†** | -0.352**†** | **-0.087†** |
| NOX |  |  |  |  |  |  | 1 | 0.952**†** | 0.947**†** | 0.666**†** | 0.850**†** | **0.165†** |
| NO |  |  |  |  |  |  |  | 1 | 0.802**†** | 0.739**†** | 0.891**†** | **0.240†** |
| NO2 |  |  |  |  |  |  |  |  | 1 | 0.520**†** | 0.716**†** | **0.069†** |
| THC |  |  |  |  |  |  |  |  |  | 1 | 0.814**†** | 0.761**†** |
| NMHC |  |  |  |  |  |  |  |  |  |  | 1 | **0.243†** |
| CH4 |  |  |  |  |  |  |  |  |  |  |  | 1 |

CO2, carbon dioxide; CO, carbon monoxide; CH4, methane; NMHC, nonmethane hydrocarbons; NO, nitrogen monoxide; NO2, nitrogen dioxide; NOX, nitrogen oxides; O3, ozone; PM10, particulate matter < 10 μm in size; PM2.5, particulate matter < 2.5 μm in size; SO2, sulfur dioxide; THC, total hydrocarbons.

†Correlation significant at the 0.001 level (two-tailed).

Absolute values of correlation coefficient values of < 0.3 denote a low strength of correlation, which qualifies as the controlling pollutant in multiple-pollutant models of targeted pollutants.

**Supplementary Table S2.** Mean and distribution of air pollutants linked to the present study population according to the postal code over a 10-year exposure period

|  | Mean | SD | Median | 5th | 95th | Min | Max | IQR | T1/T2  cutoff | T2/T3  cutoff |
| --- | --- | --- | --- | --- | --- | --- | --- | --- | --- | --- |
| SO2 (ppb) | 4.16 | 1.18 | 3.85 | 2.93 | 7.03 | 0.58 | 10.62 | 0.63 | 3.59 | 4.04 |
| CO2 (ppm) | 401.82 | 9.40 | 399.94 | 388.45 | 418.07 | 343.47 | 463.65 | 7.60 | 398.96 | 402.95 |
| CO(ppm) | 0.54 | 0.11 | 0.53 | 0.37 | 0.69 | 0.27 | 1.17 | 0.18 | 0.47 | 0.60 |
| O3 (ppb) | 28.61 | 1.93 | 28.21 | 26.46 | 31.73 | 18.69 | 46.23 | 2.18 | 27.77 | 29.11 |
| PM10 (μg/m3) | 54.61 | 9.21 | 54.62 | 44.26 | 70.75 | 31.04 | 81.54 | 12.19 | 48.00 | 56.96 |
| PM2.5 (μg/m3) | 32.69 | 6.28 | 32.63 | 25.85 | 45.44 | 0.64 | 107.00 | 9.38 | 27.81 | 35.13 |
| NOX (ppb) | 25.56 | 7.10 | 24.75 | 15.12 | 36.22 | 5.35 | 53.11 | 12.19 | 21.17 | 29.25 |
| NO(ppb) | 7.46 | 3.83 | 6.36 | 2.90 | 14.88 | 0.90 | 26.04 | 6.21 | 4.81 | 8.16 |
| NO2 (ppb) | 18.10 | 3.64 | 18.52 | 11.88 | 22.94 | 4.35 | 28.23 | 5.90 | 16.34 | 20.40 |
| THC(ppm) | 2.25 | 0.13 | 2.23 | 2.05 | 2.43 | 1.72 | 3.21 | 0.18 | 2.17 | 2.32 |
| NMHC(ppm) | 0.29 | 0.09 | 0.27 | 0.15 | 0.45 | 0.04 | 0.95 | 0.10 | 0.25 | 0.33 |
| CH4 (ppm) | 1.96 | 0.08 | 1.96 | 1.85 | 2.12 | 1.51 | 2.67 | 0.08 | 1.93 | 1.98 |

SD, standard deviation; 5th, 5 percentile; 95th, 95 percentile; Min, minimum; Max, maximum; IQR, interquartile range; T1/T2 cutoff, 33.33 percentile; T2/T3 cutoff, 66.66 percentile; ppb, parts per billion; ppm, parts per million; μg/m3, microgram/cubic meter; CO2, carbon dioxide; CO, carbon monoxide; CH4, methane; NMHC, nonmethane hydrocarbons; NO, nitrogen monoxide; NO2, nitrogen dioxide; NOx, nitrogen oxides; O3, ozone; PM10, particulate matter < 10 μm in size; PM2.5, particulate matter < 2.5 μm in size; SO2, sulfur dioxide; THC, total hydrocarbons.

| **Supplementary Table S3.** Sensitivity analysis showing adjusted hazard ratios of developing urinary bladder cancer stratified by sex during long-term THC or NMHC exposure at a standard deviation (SD) increment controlled for PM2.5 and other air pollutants | | | |
| --- | --- | --- | --- |
| **Ambient pollutant category** | **Controlling pollutant***a* | **Adjusted HR***b* **(95% CI)** | |
| **Male**  **(n = 297,233)** | **Female**  **(n = 291,902)** |
| THC  (0.13-ppm increase) | - | 1.78 (1.68, 1.88)‡ | 1.91 (1.78, 2.06)‡ |
| SO2 | 1.76 (1.66, 1.86)‡ | 1.91 (1.77, 2.05)‡ |
| PM10 | 1.97 (1.86, 2.09)‡ | 2.09 (1.93, 2.26)‡ |
| PM2.5 | 2.04 (1.92, 2.17)‡ | 2.19 (2.02, 2.37)‡ |
| NMHC  (0.09-ppm increase) | - | 1.34 (1.27, 1.41)‡ | 1.43 (1.33, 1.53)‡ |
| SO2 | 1.31 (1.24, 1.38)‡ | 1.43 (1.33, 1.54)‡ |
| CH4 | 1.12 (1.07, 1.18)‡ | 1.14 (1.07, 1.22)‡ |
| SO2, CH4 | 1.08 (1.03, 1.14)‡ | 1.13 (1.05, 1.21)‡ |
| HR, hazard ratio; CI, confidence interval; SO2, sulfur dioxide; PM10, particulate matter < 10 μm in size; PM2.5, particulate matter < 2.5 μm in size; CH4, methane.  *a*Additional pollutants were added into the pollutant models for multiple analysis only when |Pearson’s correlation coefficient| < 0.3 (Suppl Table S1).  *b*Cox regression models were adjusted for age, sex, level of urbanization, black-foot disease endemic region, essential hypertension, chronic cystitis, smoking-related diagnoses, alcohol use disorders, morbid obesity, spinal cord injury, chronic liver disease, diabetes mellitus, gout, chronic kidney disease, pesticide exposures, dyslipidemia, lag0-2, season, and ambient temperature, controlled pollutants (weak correlation with THC or NMHC).  ‡p < 0.001. | | | |

| **Supplementary Table S4.** Sensitivity analysis showing adjusted hazard ratios of the incidence of urinary bladder cancer stratified by diabetes mellitus status during long-term THC or NMHC exposure at a standard deviation (SD) increment controlled for PM2.5, and other air pollutants | | | |
| --- | --- | --- | --- |
| **Air pollutant category** | **Controlling pollutant***a* | **Adjusted HR***b* **(95% CI)** | |
| **Diabetes mellitus**  **(n = 138,203)** | **Non-diabetes mellitus**  **(n = 450,932)** |
| THC  (0.13-ppm increase) | - | 1.99 (1.84, 2.16)‡ | 1.76 (1.67, 1.86)‡ |
| SO2 | 1.99 (1.83, 2.15)‡ | 1.74 (1.65, 1.84)‡ |
| PM10 | 2.20 (2.02, 2.39)‡ | 1.94 (1.83, 2.05)‡ |
| PM2.5 | 2.34 (2.14, 2.55)‡ | 2.00 (1.88, 2.11)‡ |
| NMHC  (0.09-ppm increase) | - | 1.48 (1.36, 1.60)‡ | 1.33 (1.27, 1.40)‡ |
| SO2 | 1.48 (1.37, 1.61)‡ | 1.31 (1.24, 1.38)‡ |
| CH4 | 1.22 (1.13, 1.32)‡ | 1.10 (1.04, 1.15)‡ |
| SO2, CH4 | 1.20 (1.11, 1.30)‡ | 1.06 (1.01, 1.12)‡ |
| HR, hazard ratio; CI, confidence interval; SO2, sulfur dioxide; PM10, particulate matter < 10 μm in size; PM2.5, particulate matter < 2.5 μm in size; CH4, methane.  *a*Additional pollutants were added into the pollutant models for multiple analysis only when the absolute value of Pearson’s correlation coefficient was < 0.3.  *b*Cox regression models were adjusted for age, sex, level of urbanization, black-foot disease endemic region, essential hypertension, chronic cystitis, smoking-related diagnoses, alcohol use disorders, morbid obesity, spinal cord injury, chronic liver disease, diabetes mellitus, gout, chronic kidney disease, pesticide exposures, dyslipidemia, lag0-2, season, and ambient temperature, controlled pollutants (weak correlation with THC or NMHC).  ‡p < 0.001. | | | |
